# Supplementary material for: A Facile Strategy for the High Yielding, Quantitative Conversion of Polyglycol End-Groups to Amines
Source: MDPI journal article supplement (doi:10.3390/polym13091403), 2021-04-26
Supplement: s1 [file s1]

# A facile strategy for the high yielding, quantitative conversion of polyglycol end-groups to amines

Jie Yan, Paula Facal Marina and Anton Blencowe\*

Applied Chemistry and Translational Biomaterials (ACTB) Group, Clinical and Health Sciences, University of South Australia, Adelaide, SA 5001, Australia; jie.yan@mymail.unisa.edu.au (J.Y.); paula.facalmarina@unisa.edu.au (P.F.M.)

\* Correspondence: anton.blencowe@unisa.edu.au

## Supporting Information

1. Synthesis of  $\alpha,\omega$ -diamino PEG<sub>1.5k</sub> via the Staudinger reaction
2. Supporting Figures
  - a. FTIR spectra of  $\alpha$ -methoxy PEG<sub>5k</sub> derivatives
  - b. NMR spectra of PEG<sub>1.5k</sub> amine prepared from Staudinger reaction
  - c. GPC chromatograms of methoxy PEG<sub>5k</sub> and its derivatives
  - d. NMR spectra
  - e. MALDI-ToF mass spectra
  - f. GPC chromatograms
  - g. Figures for sequential reagent addition synthesis
3. Supporting Table

## References

---

## 1. Synthesis of $\alpha,\omega$ -diamino PEG<sub>1.5k</sub> via the Staudinger reaction

The reduction of  $\alpha,\omega$ -diazido PEG<sub>1.5k</sub> to  $\alpha,\omega$ -diamino PEG<sub>1.5k</sub> via the Staudinger reaction was conducted according to published literature procedures [1, 2] with modification.  $\alpha,\omega$ -Diazido PEG<sub>1.5k</sub> (1.00 g, 667  $\mu$ mol) and PPh<sub>3</sub> (1.40 g, 5.33 mmol, 4 equiv. per azide group) were dissolved in a 1:3 v/v ultrapure water:THF solution (8 mL) and stirred at 25 °C for 24 h. The reaction mixture was filtered with a sintered funnel under vacuum and the filtrate was concentrated *in vacuo* to remove the THF. 1 M HCl was added to the residue to adjust the pH to 1 and the resulting precipitate was filtered off using a sintered funnel under vacuum. The aqueous filtrate was then extracted with diethyl ether (3  $\times$  10 mL), and the pH was adjusted to 13 using 1 M NaOH prior to extraction with DCM (3  $\times$  5 mL). The combined DCM extracts were concentrated *in vacuo* to ~ 3 mL in volume and then precipitated into cold (0 °C) diethyl ether (40 mL) with stirring. The precipitated polymer was collected via centrifugation (6000 rpm, 3 min), redissolved in DCM (3 mL) and precipitated into cold (0 °C) diethyl ether (40 mL) with stirring; this step was repeated twice. The precipitated polymer was collected via centrifugation (5000 rpm, 3 min) and dried under high vacuum (0.1 mbar) to afford the product (0.59 g) contaminated with PPh<sub>3</sub> and PPh<sub>3</sub>O.

## 2. Supporting Figures

### a. FTIR spectra of $\alpha$ -methoxy PEG<sub>5k</sub> derivatives

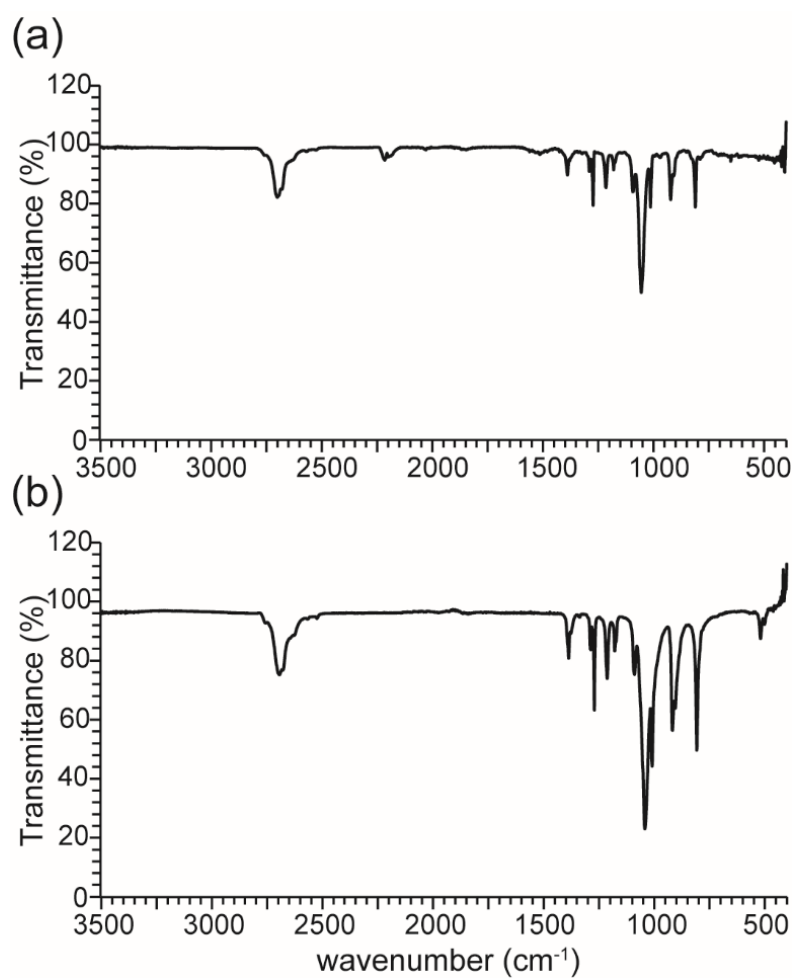

**Figure S1.** FTIR spectra of (a)  $\alpha$ -methoxy- $\omega$ -hydroxy and (b)  $\alpha$ -methoxy- $\omega$ -amino PEG<sub>5k</sub>

b. NMR spectra of amino-terminated PEG<sub>1.5k</sub> prepared via the Staudinger reaction

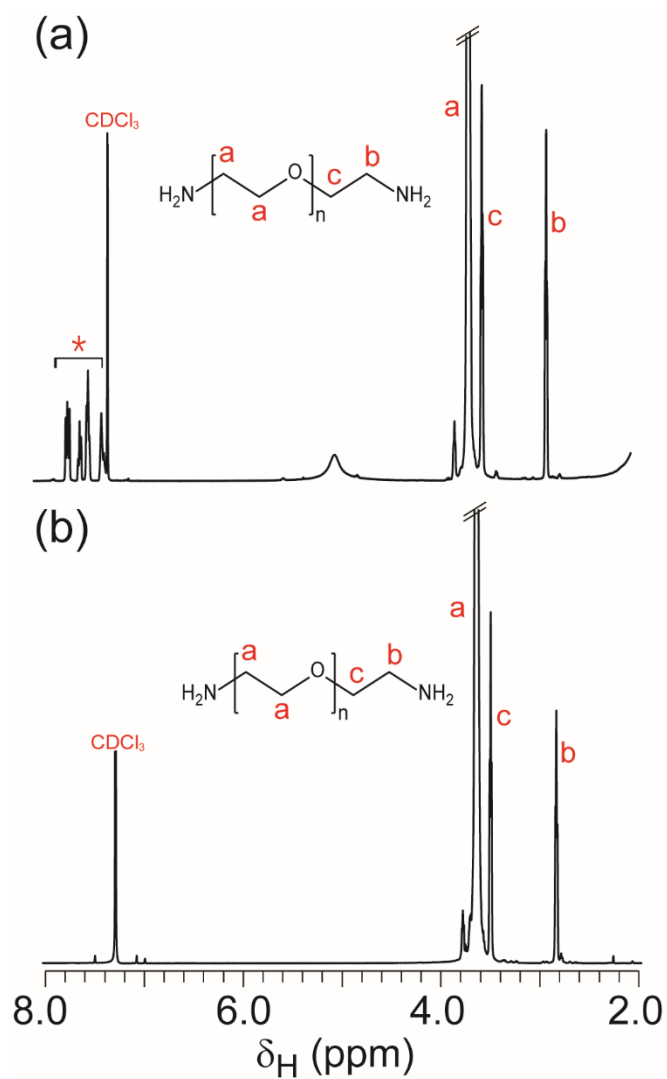

**Figure S2.** <sup>1</sup>H NMR spectra (500 MHz, 23 °C, CDCl<sub>3</sub>) of α,ω-diamine PEG<sub>1.5k</sub> prepared from α,ω-diazido PEG<sub>1.5k</sub> via (a) the Staudinger reaction (\* indicates Ph<sub>3</sub>P and Ph<sub>3</sub>PO impurities present after purification) and (b) Zn / NH<sub>4</sub>Cl reduction.

c. GPC chromatograms of  $\alpha$ -methoxy PEG<sub>5k</sub> derivatives

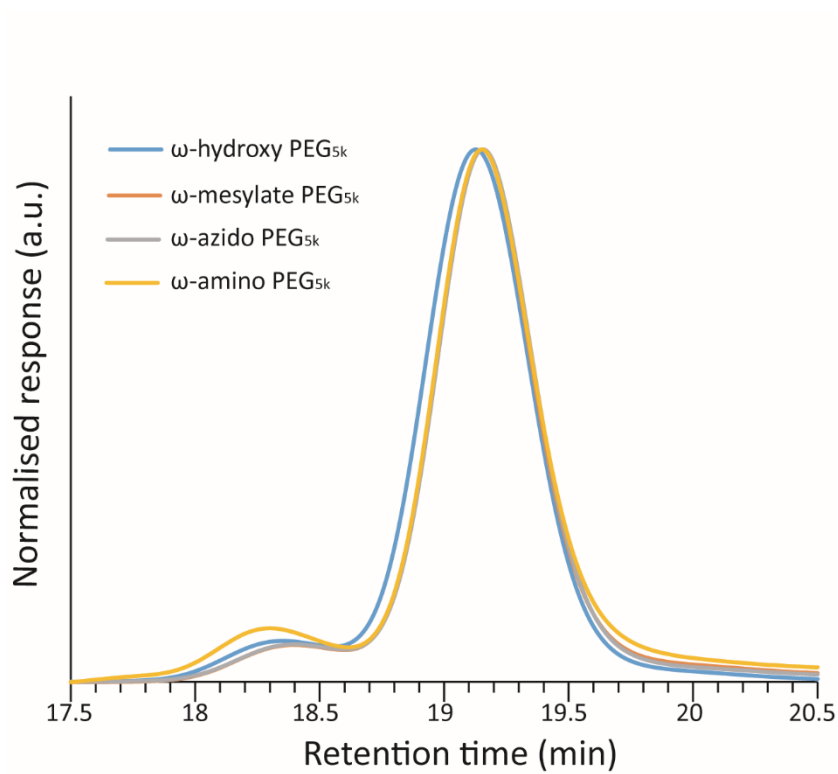

**Figure S3.** GPC chromatograms of the  $\alpha$ -methoxy- $\omega$ -hydroxy,  $\alpha$ -methoxy- $\omega$ -mesylate,  $\alpha$ -methoxy- $\omega$ -azido and  $\alpha$ -methoxy- $\omega$ -amino PEG<sub>5k</sub> derivatives recorded using THF as the mobile phase.

d. NMR spectra showing the conversion of hydroxy- to amino-terminated polyglycols

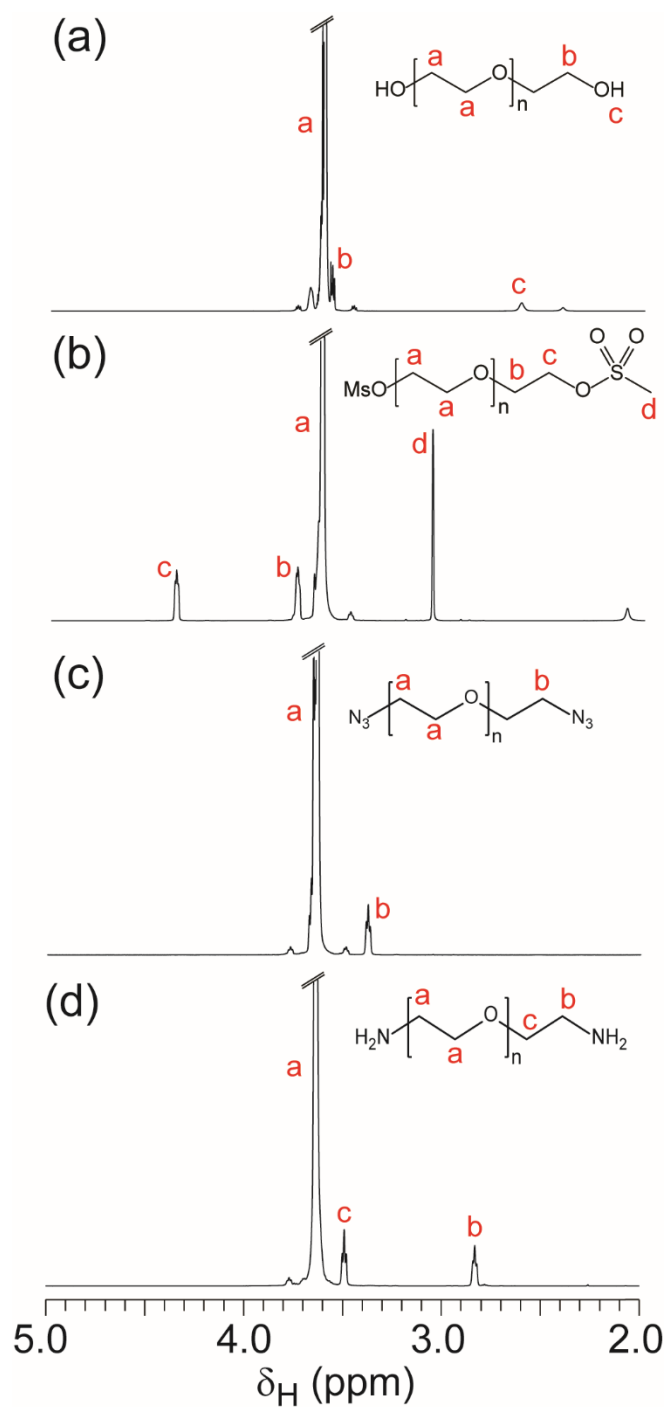

**Figure S4.**  $^1\text{H}$  NMR spectra (500 MHz, 23 °C,  $\text{CDCl}_3$ ) showing the conversion of the (a)  $\alpha,\omega$ -dihydroxy  $\text{PEG}_{1.5k}$  to its (b)  $\alpha,\omega$ -dimesylate, (c)  $\alpha,\omega$ -diazido and (d)  $\alpha,\omega$ -diamino  $\text{PEG}_{1.5k}$  derivatives.

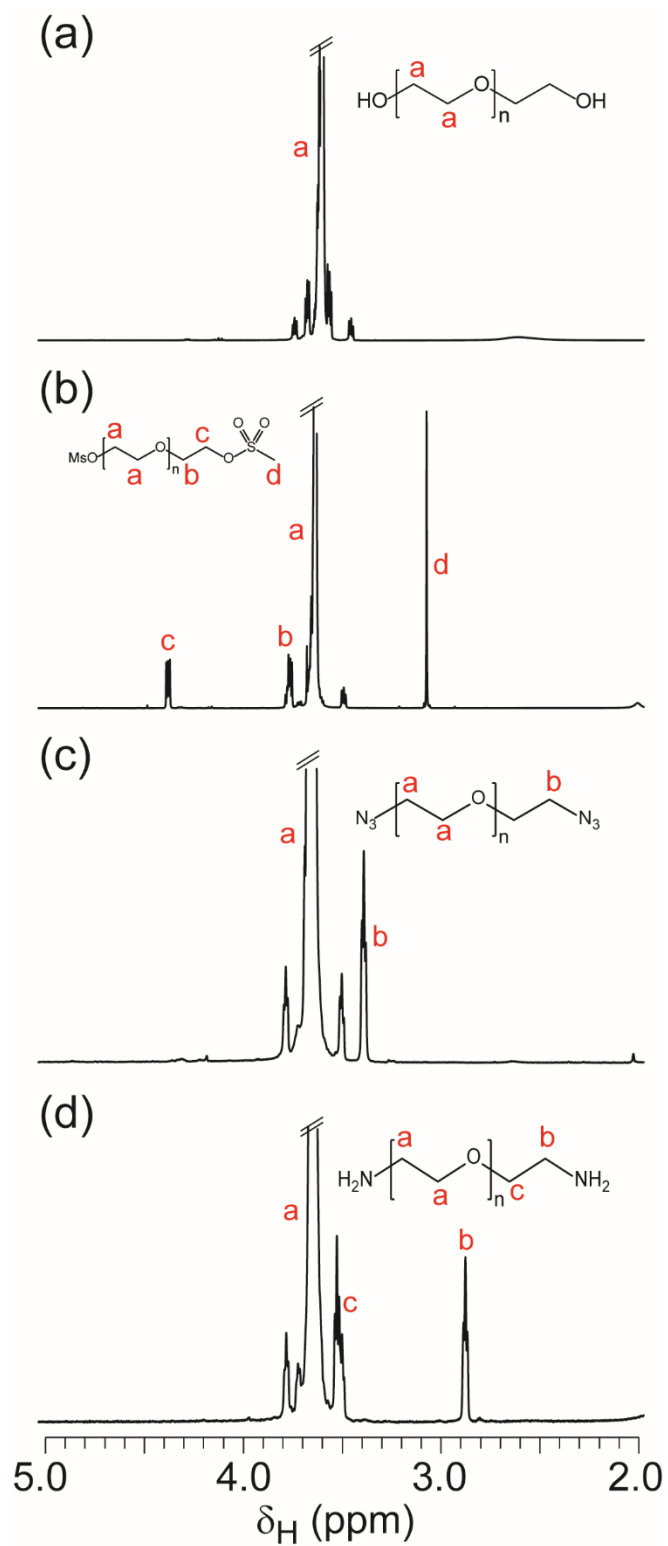

**Figure S5.**  $^1\text{H}$  NMR spectra (500 MHz, 23 °C,  $\text{CDCl}_3$ ) showing the conversion of the (a)  $\alpha,\omega$ -dihydroxy PEG<sub>4k</sub> to its (b)  $\alpha,\omega$ -dimesylate, (c)  $\alpha,\omega$ -diazido and (d)  $\alpha,\omega$ -diamino PEG<sub>4k</sub> derivatives.

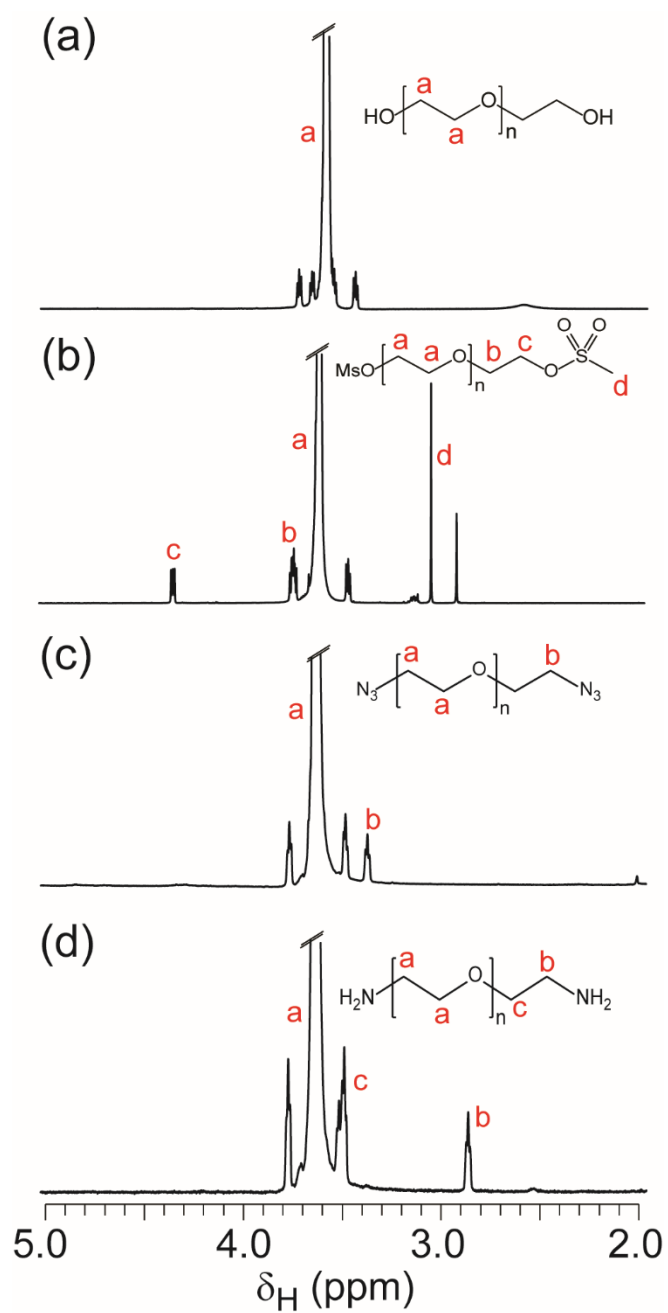

**Figure S6.**  $^1\text{H}$  NMR spectra (500 MHz, 23 °C,  $\text{CDCl}_3$ ) showing the conversion of the (a)  $\alpha,\omega$ -dihydroxy PEG<sub>10k</sub> to its (b)  $\alpha,\omega$ -dimesylate, (c)  $\alpha,\omega$ -diazido and (d)  $\alpha,\omega$ -diamino PEG<sub>10k</sub> derivatives.



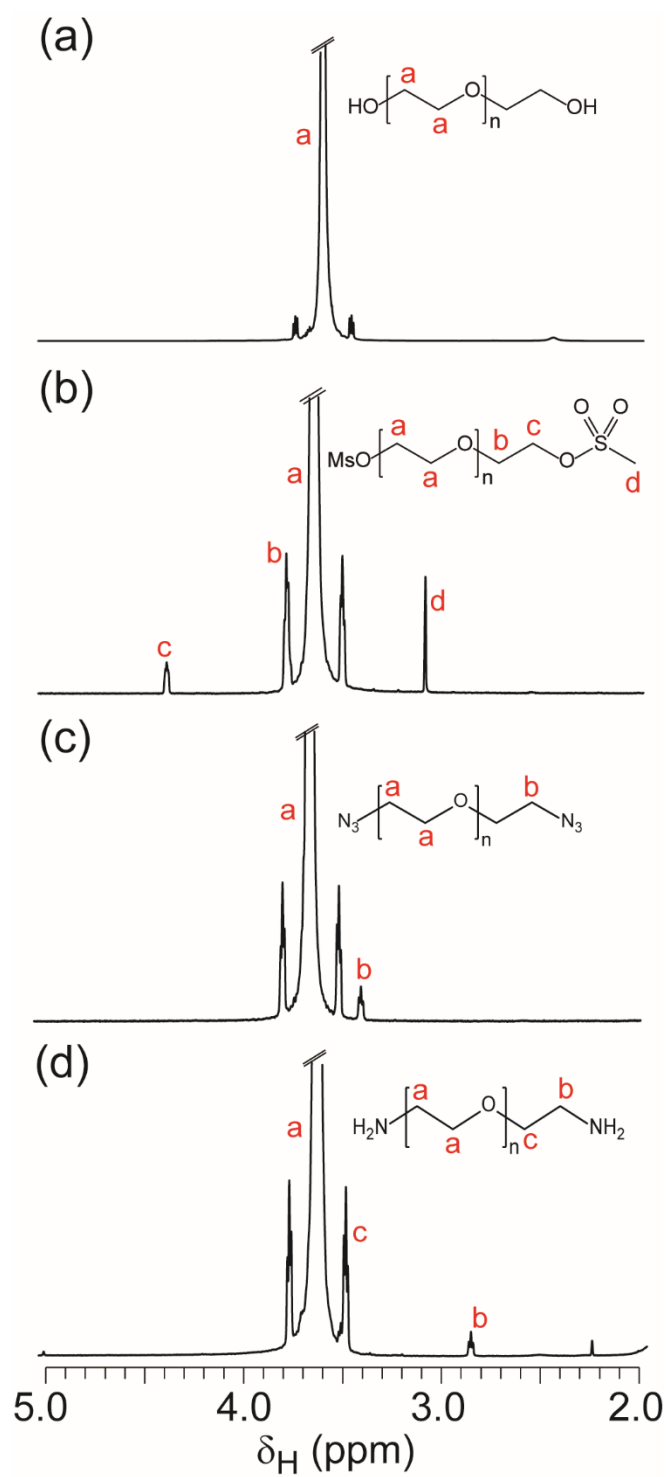

**Figure S7.**  $^1\text{H}$  NMR spectra (500 MHz, 23  $^\circ\text{C}$ ,  $\text{CDCl}_3$ ) showing the conversion of the (a)  $\alpha,\omega$ -dihydroxy PEG<sub>35k</sub> to its (b)  $\alpha,\omega$ -dimesylate, (c)  $\alpha,\omega$ -diazido and (d)  $\alpha,\omega$ -diamino PEG<sub>35k</sub> derivatives.

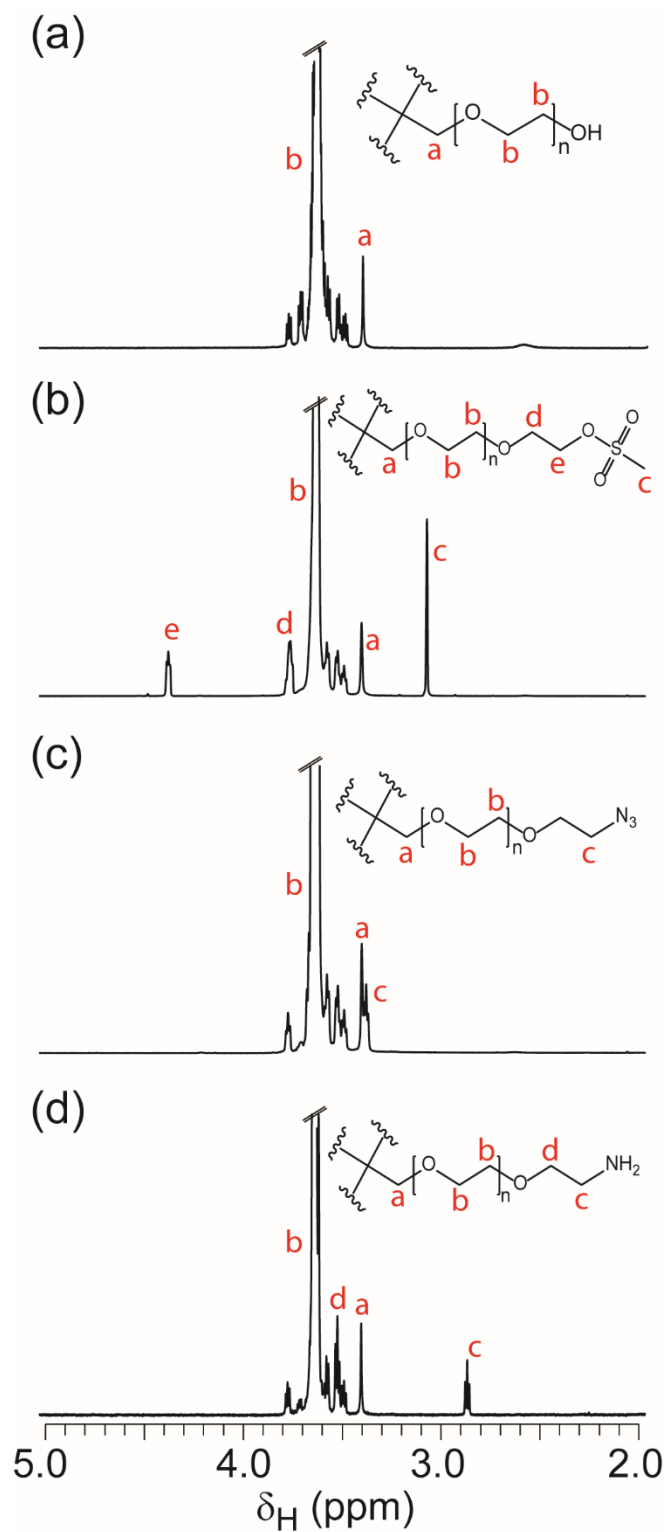

**Figure S8.**  $^1\text{H}$  NMR spectra (500 MHz, 23 °C,  $\text{CDCl}_3$ ) showing the conversion of the (a) 4-armed tetrahydroxy PEG<sub>10k</sub> to its (b) mesylate-, (c) azido-, and (d) amino-terminated derivatives.

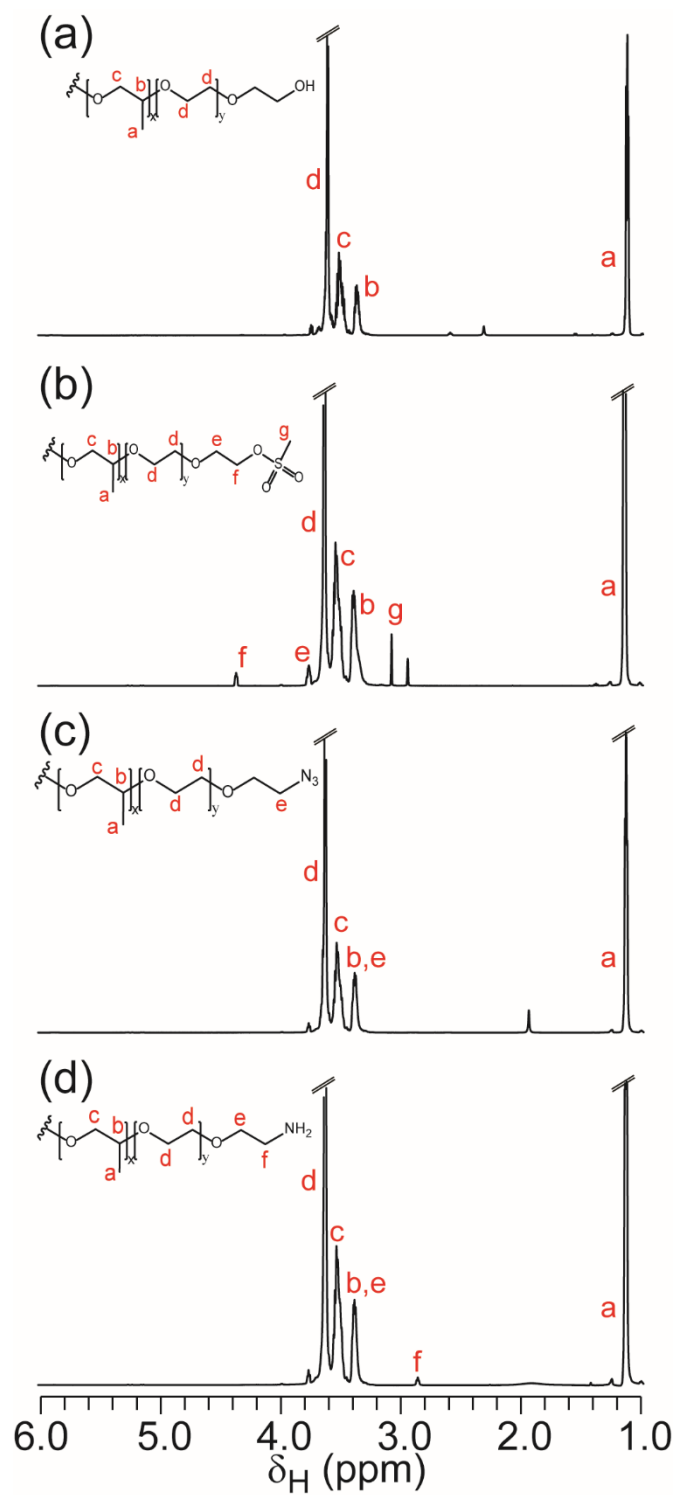

**Figure S9.**  $^1\text{H}$  NMR spectra (500 MHz, 23 °C,  $\text{CDCl}_3$ ) showing the conversion of (a) Pluronic® F-127 ( $\alpha,\omega$ -dihydroxy PEG-PPG-PEG triblock copolymer,  $M_n \sim 12600$ ) to its (b)  $\alpha,\omega$ -dimesylate, (c)  $\alpha,\omega$ -diazido and (d)  $\alpha,\omega$ -diamino derivatives.

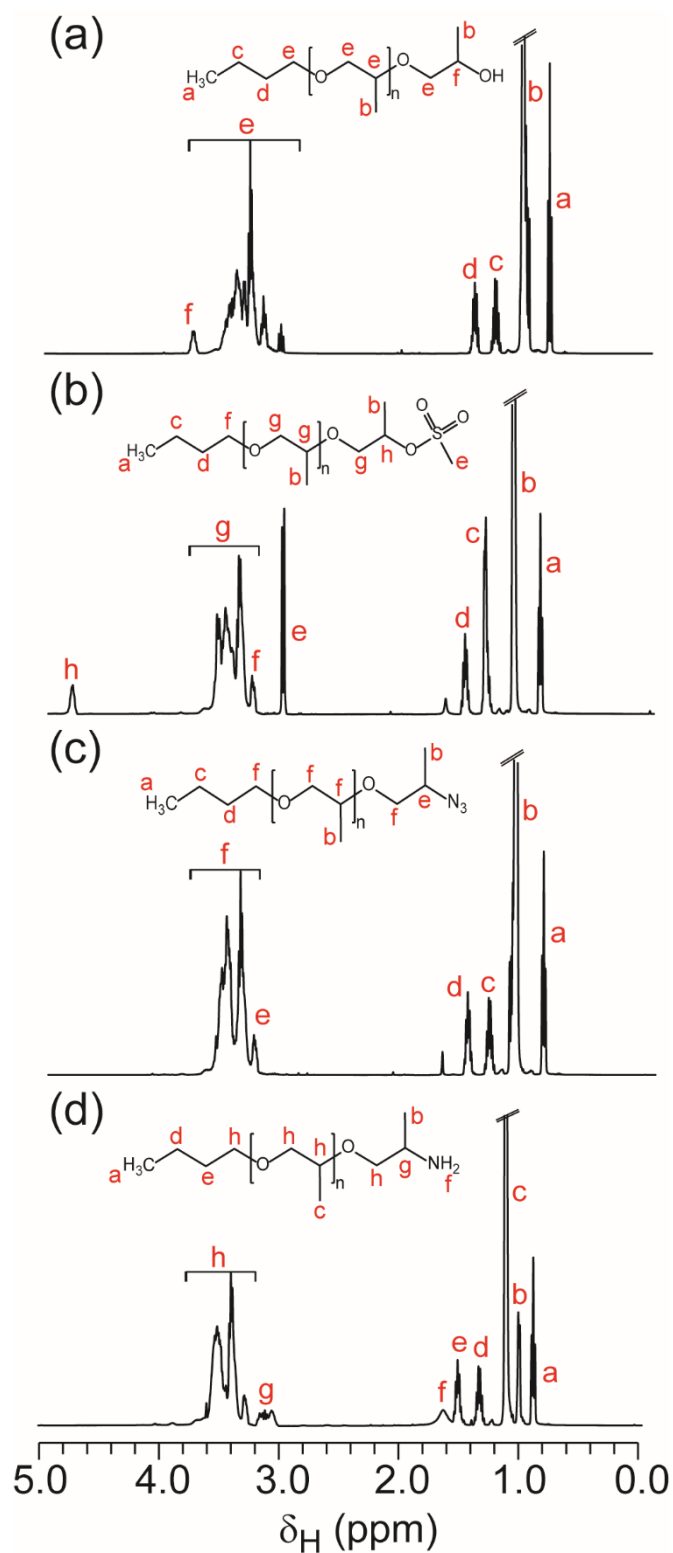

**Figure S10.**  $^1\text{H}$  NMR spectra (500 MHz, 23 °C,  $\text{CDCl}_3$ ) showing the conversion of (a)  $\alpha$ -butyl- $\omega$ -hydroxy PPG to its (b)  $\alpha$ -butyl- $\omega$ -mesylate, (c)  $\alpha$ -butyl- $\omega$ -azido and (d)  $\alpha$ -butyl- $\omega$ -amino PPG derivatives.

e. MALDI-ToF mass spectra showing the conversion of hydroxy- to amino-terminated polyglycols

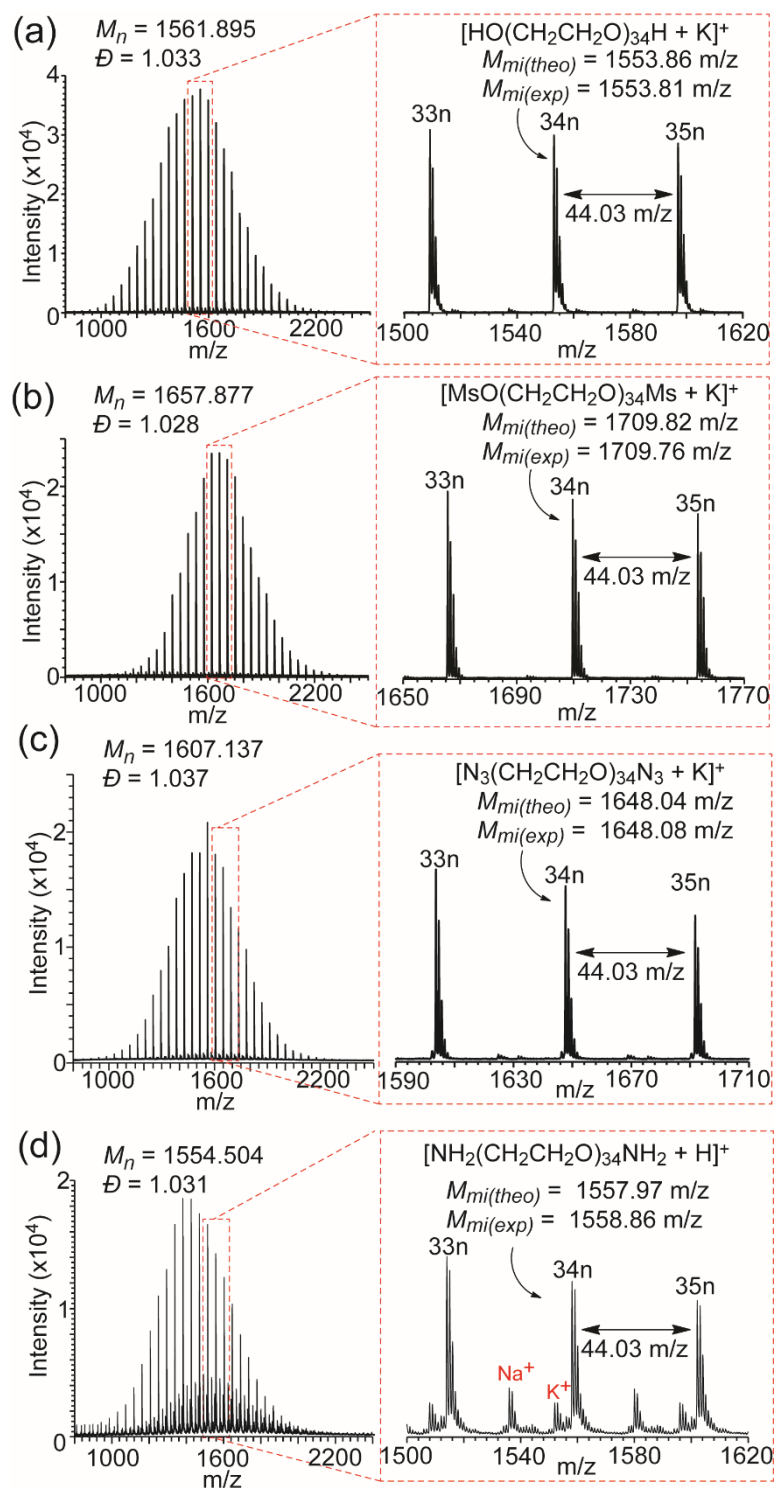

**Figure S111.** MALDI-ToF mass spectra showing the conversion of the (a)  $\alpha,\omega$ -dihydroxy PEG<sub>1.5k</sub> to its (b)  $\alpha,\omega$ -dimesylate, (c)  $\alpha,\omega$ -diazido and (d)  $\alpha,\omega$ -diamine PEG<sub>1.5k</sub> derivatives: expansions show 33-35 repeat unit region of the spectra with the theoretical ( $M_{mi(\text{theo})}$ ) and experimentally determined ( $M_{mi(\text{exp})}$ ) monoisotopic mass values for the potassium or proton adducts of polymers with  $n = 34$ .

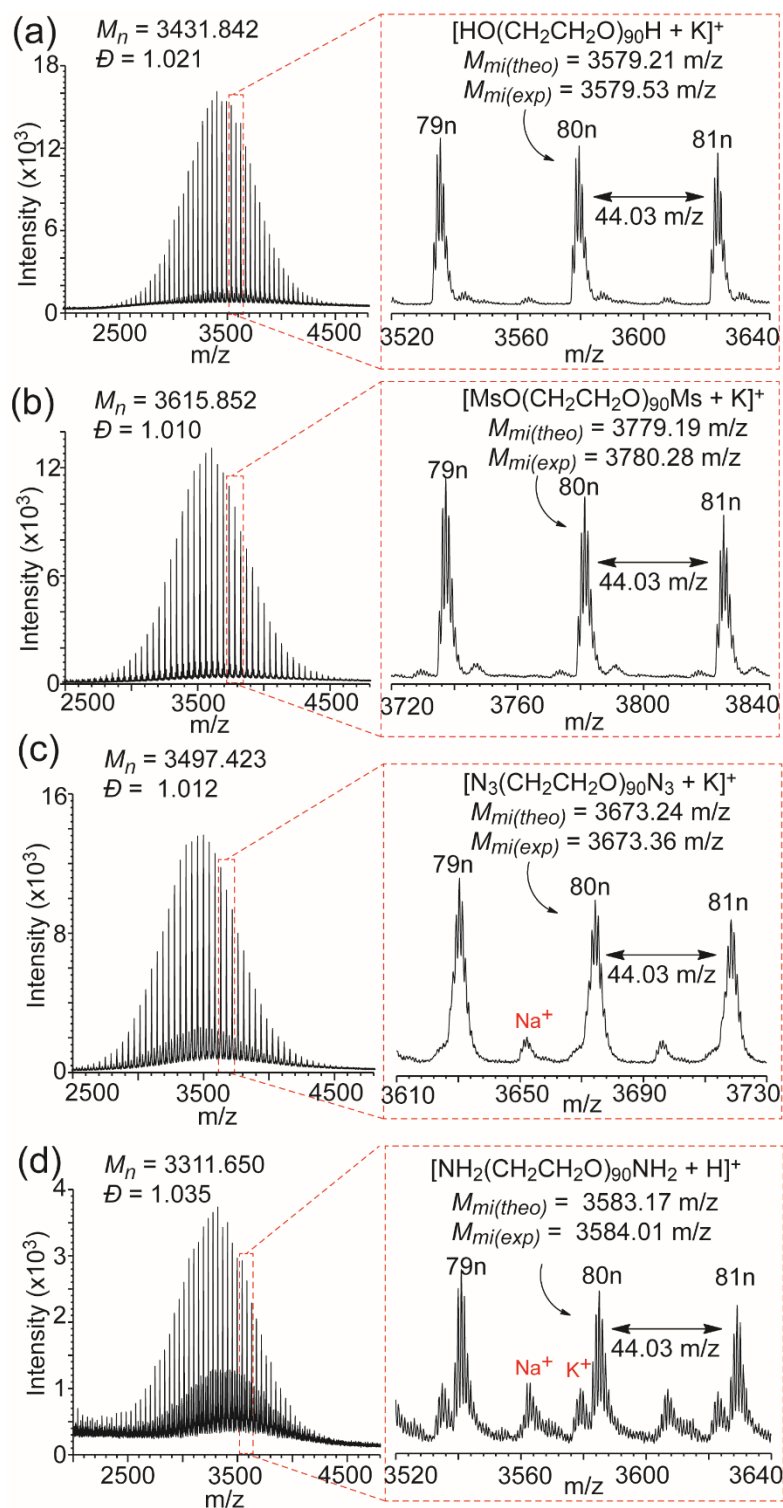

**Figure S12.** MALDI-ToF mass spectra showing the conversion of the (a)  $\alpha,\omega$ -dihydroxy PEG<sub>4k</sub> to its (b)  $\alpha,\omega$ -dimesylate, (c)  $\alpha,\omega$ -diazido and (d)  $\alpha,\omega$ -diamine PEG<sub>4k</sub> derivatives: expansions show 79-81 repeat unit region of the spectra with the theoretical ( $M_{mi(theo)}$ ) and experimentally determined ( $M_{mi(exp)}$ ) monoisotopic mass values for the potassium or proton adducts of polymers with  $n = 80$ .

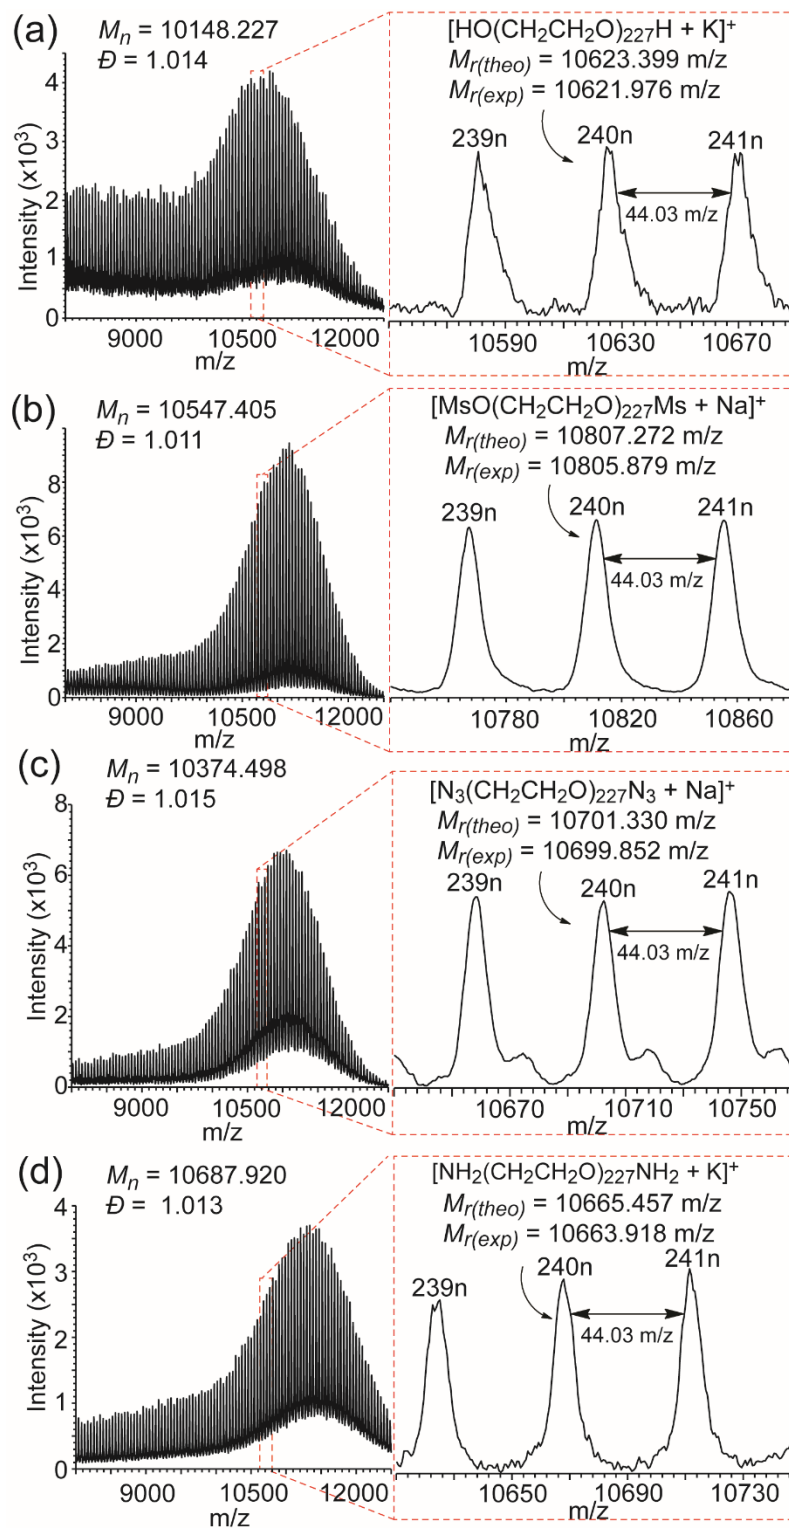

**Figure S13.** MALDI-ToF mass spectra showing the conversion of the (a)  $\alpha,\omega$ -dihydroxy PEG<sub>10k</sub> to its (b)  $\alpha,\omega$ -dimesylate, (c)  $\alpha,\omega$ -diazido and (d)  $\alpha,\omega$ -diamine PEG<sub>10k</sub> derivatives: expansions show 239-241 repeat unit region of the spectra with the theoretical ( $M_{r(theo)}$ ) and experimentally determined ( $M_{r(exp)}$ ) average molecular mass values for polymers with  $n = 240$ .

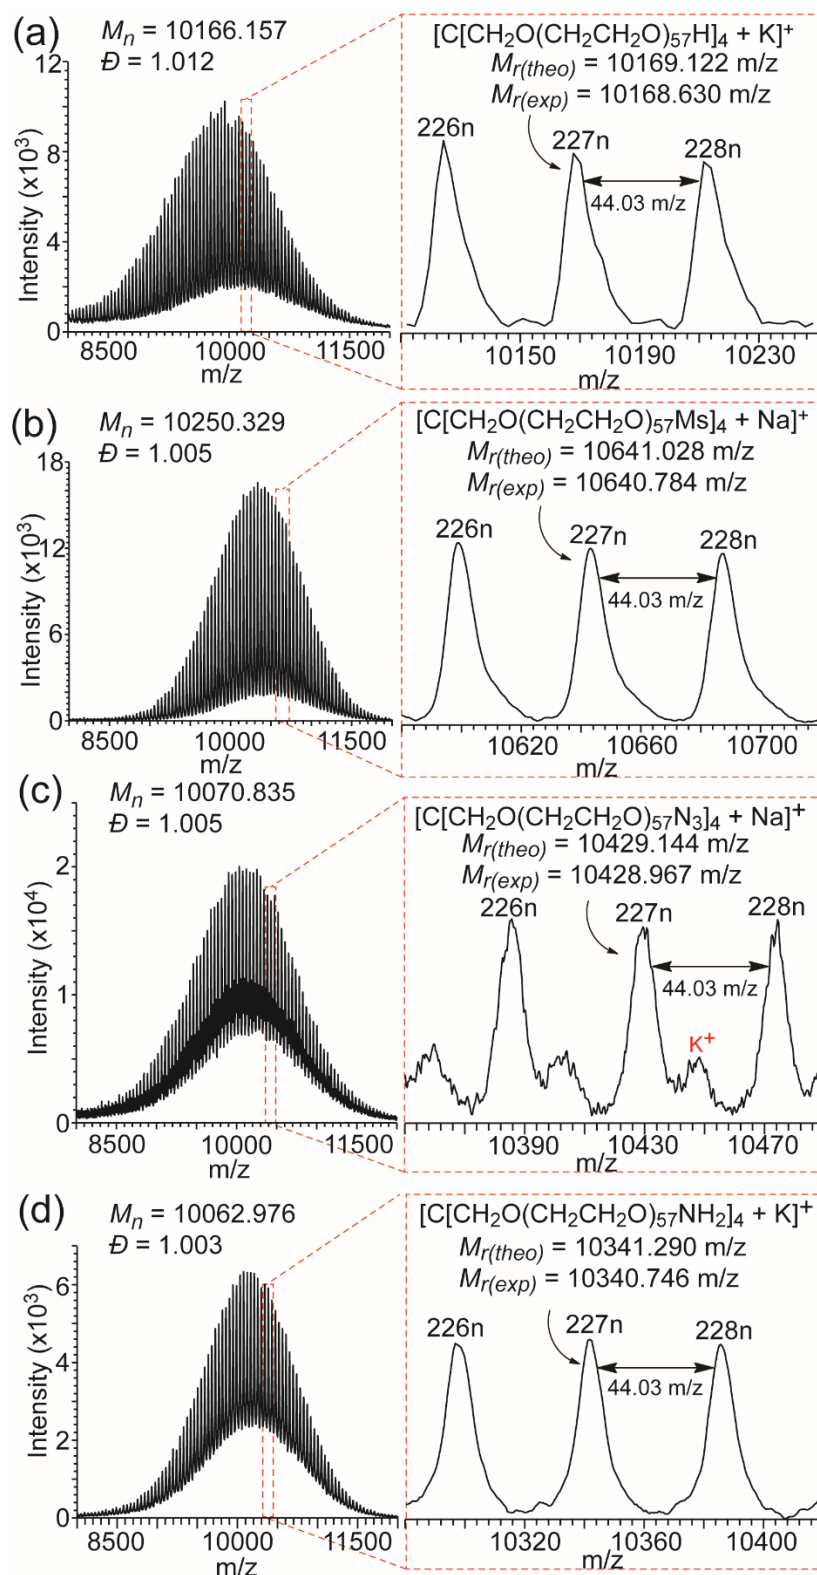

**Figure S14.** MALDI-ToF mass spectra showing the conversion of the (a) 4-armed tetrahydroxy PEG<sub>10k</sub> to its (b) mesylate-, (c) azido-, and (d) amino-terminated derivatives: expansions show 226-228 repeat unit region of the spectra with the theoretical ( $M_{r(theo)}$ ) and experimentally determined ( $M_{r(exp)}$ ) average molecular mass values for polymers with  $n = 227$ .



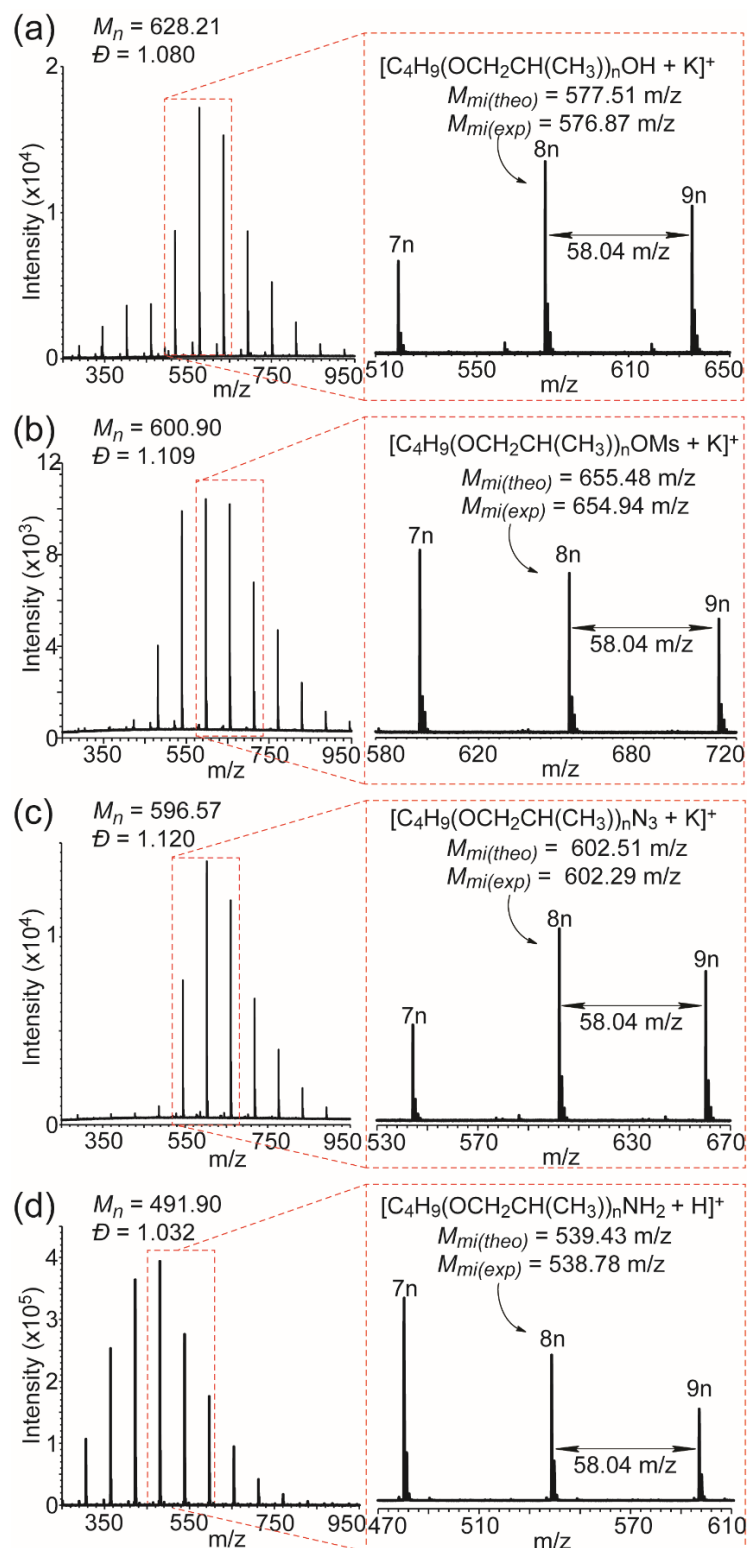

**Figure S15.** MALDI-ToF mass spectra showing the conversion of (a)  $\alpha$ -butyl- $\omega$ -hydroxy PPG to its (b)  $\alpha$ -butyl- $\omega$ -mesylate, (c)  $\alpha$ -butyl- $\omega$ -azido and (d)  $\alpha$ -butyl- $\omega$ -amino PPG derivatives: expansions show 7-9 repeat unit region of the spectra with the theoretical ( $M_{mi(theo)}$ ) and experimentally determined ( $M_{mi(exp)}$ ) monoisotopic mass values for the potassium or proton adducts of polymers with  $n = 8$ .

f. GPC chromatograms showing the conversion of hydroxy- to amino- terminated polyglycols

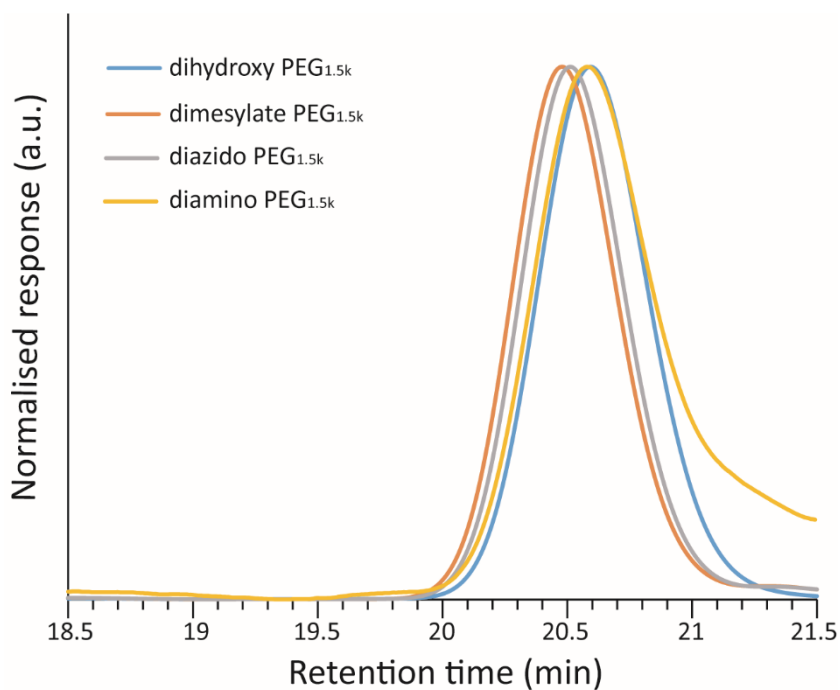

**Figure S16.** GPC chromatograms showing the conversion of the  $\alpha,\omega$ -dihydroxy PEG<sub>1.5k</sub> to its  $\alpha,\omega$ -dimesylate,  $\alpha,\omega$ -diazido and  $\alpha,\omega$ -diamino PEG<sub>1.5k</sub> derivatives recorded using THF as the mobile phase.

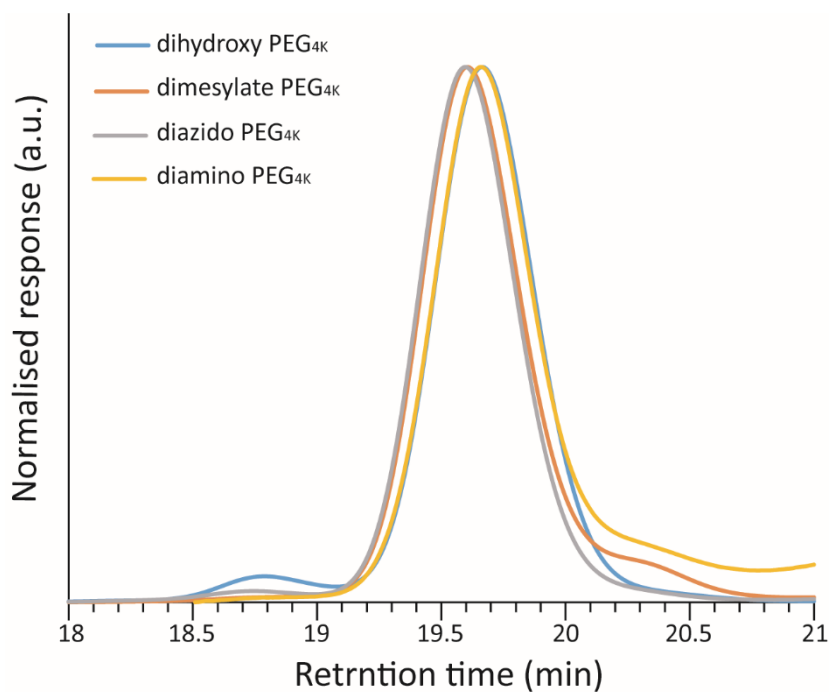

**Figure S17.** GPC chromatograms showing the conversion of the  $\alpha,\omega$ -dihydroxy PEG<sub>4k</sub> to its  $\alpha,\omega$ -dimesylate,  $\alpha,\omega$ -diazido and  $\alpha,\omega$ -diamino PEG<sub>4k</sub> derivatives recorded using THF as the mobile phase.

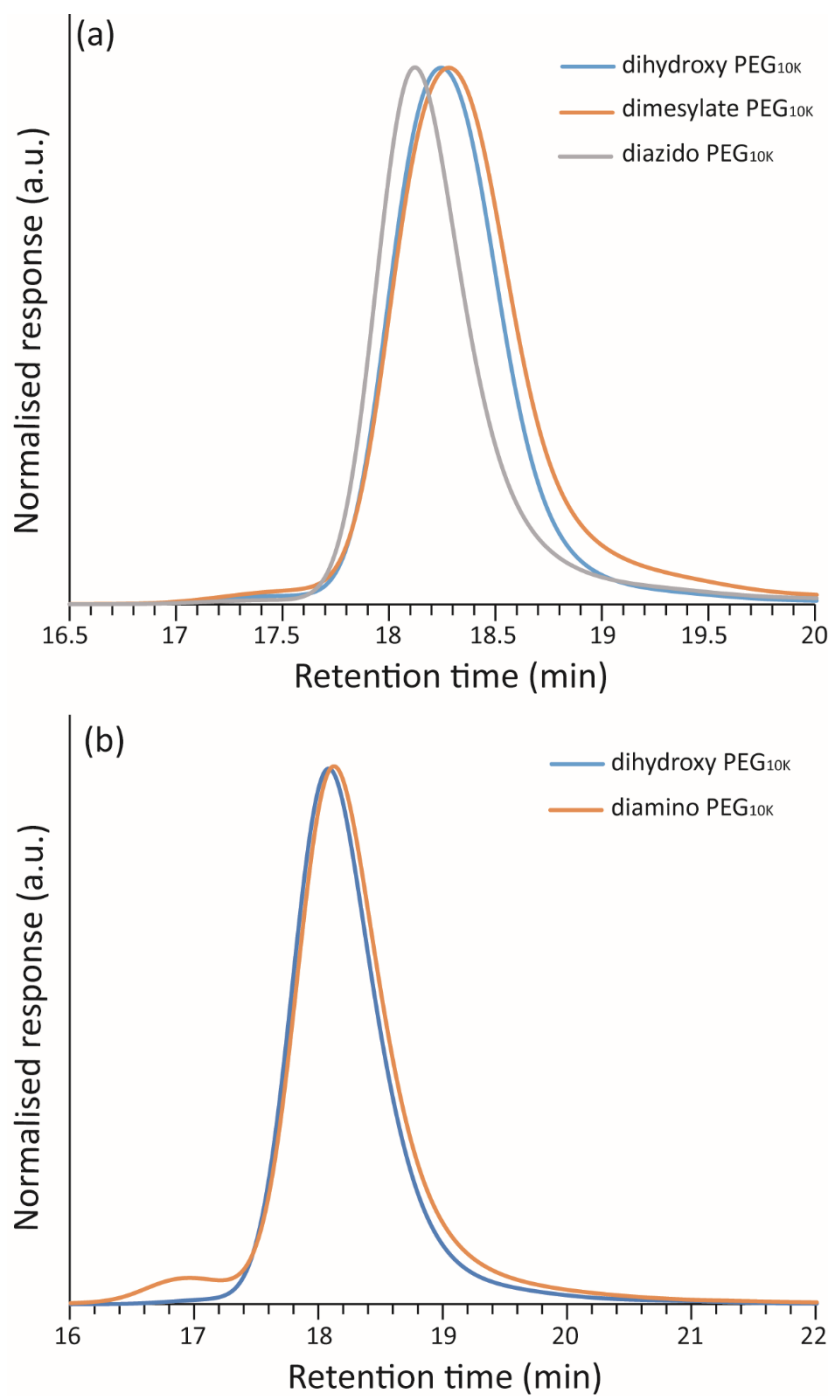

**Figure S18.** GPC chromatograms showing the conversion of the  $\alpha,\omega$ -dihydroxy PEG<sub>10K</sub> to its  $\alpha,\omega$ -dimesylate,  $\alpha,\omega$ -diazido and  $\alpha,\omega$ -diamino PEG<sub>10K</sub> derivatives recorded using (a) THF or (b) 1:1 v/v MeOH:water (due to the poor solubility and aggregation of the  $\alpha,\omega$ -diamino PEG<sub>10K</sub> derivative in THF) as the mobile phase.

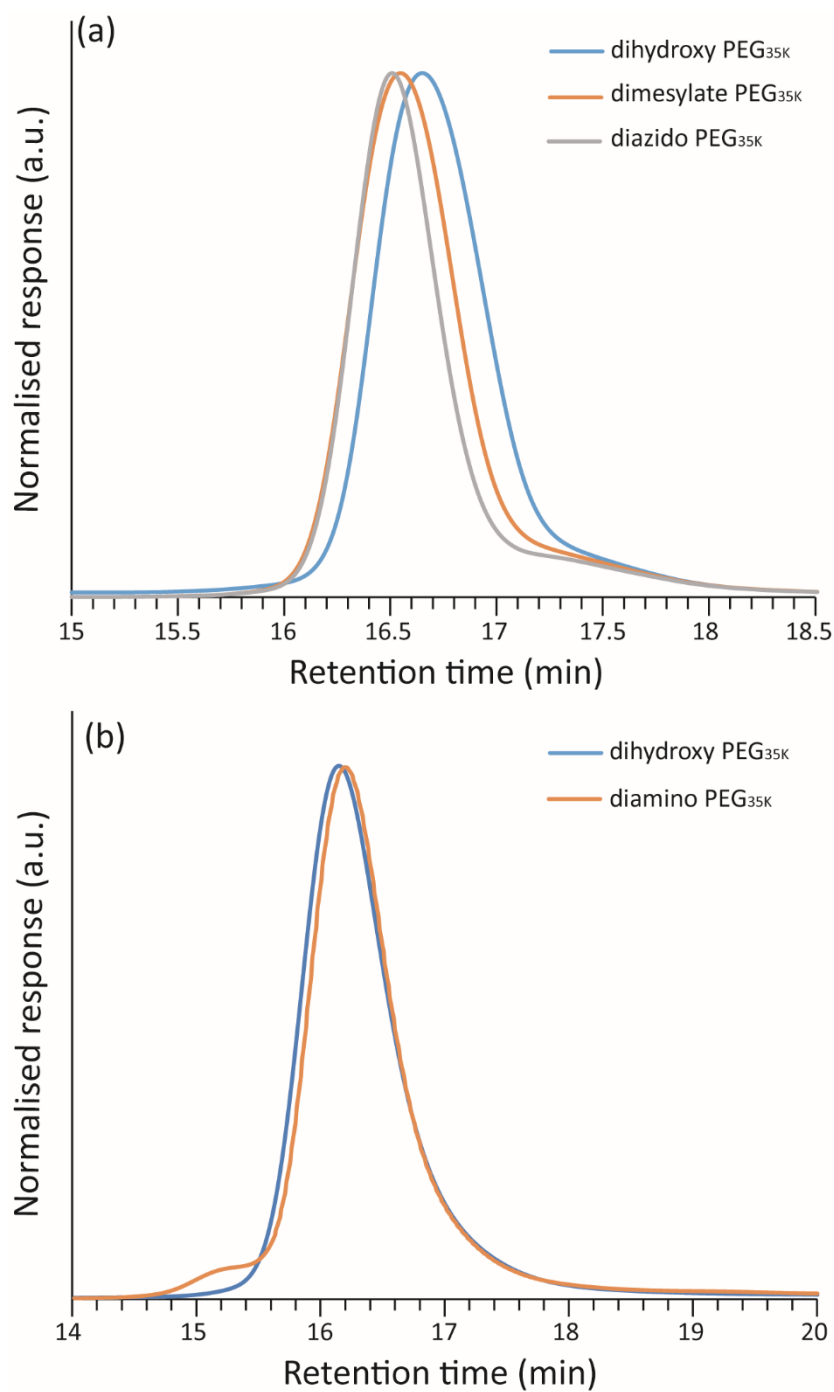

**Figure S19.** GPC chromatograms showing the conversion of the  $\alpha,\omega$ -dihydroxy PEG<sub>35k</sub> to its  $\alpha,\omega$ -dimesylate,  $\alpha,\omega$ -diazido and  $\alpha,\omega$ -diamine PEG<sub>35k</sub> derivatives recorded using (a) THF or (b) 1:1 v/v MeOH:water (due to the poor solubility and aggregation of the  $\alpha,\omega$ -diamino PEG<sub>10k</sub> derivative in THF) as the mobile phase.

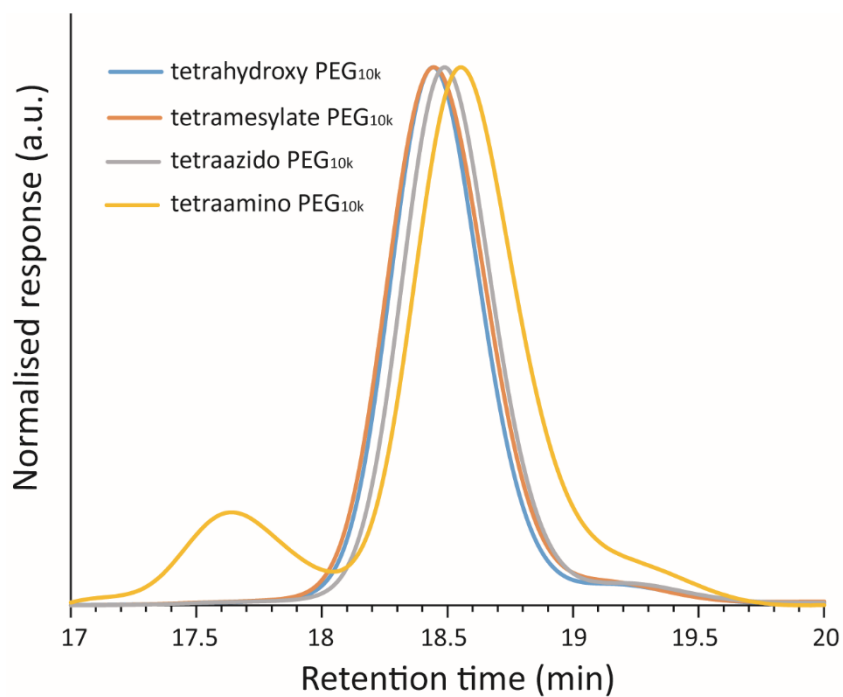

**Figure S20.** GPC chromatograms showing the conversion of the 4-armed tetrahydroxy PEG<sub>10k</sub> to its mesylate-, azido- and amino-terminated derivatives recorded using THF as the mobile phase.

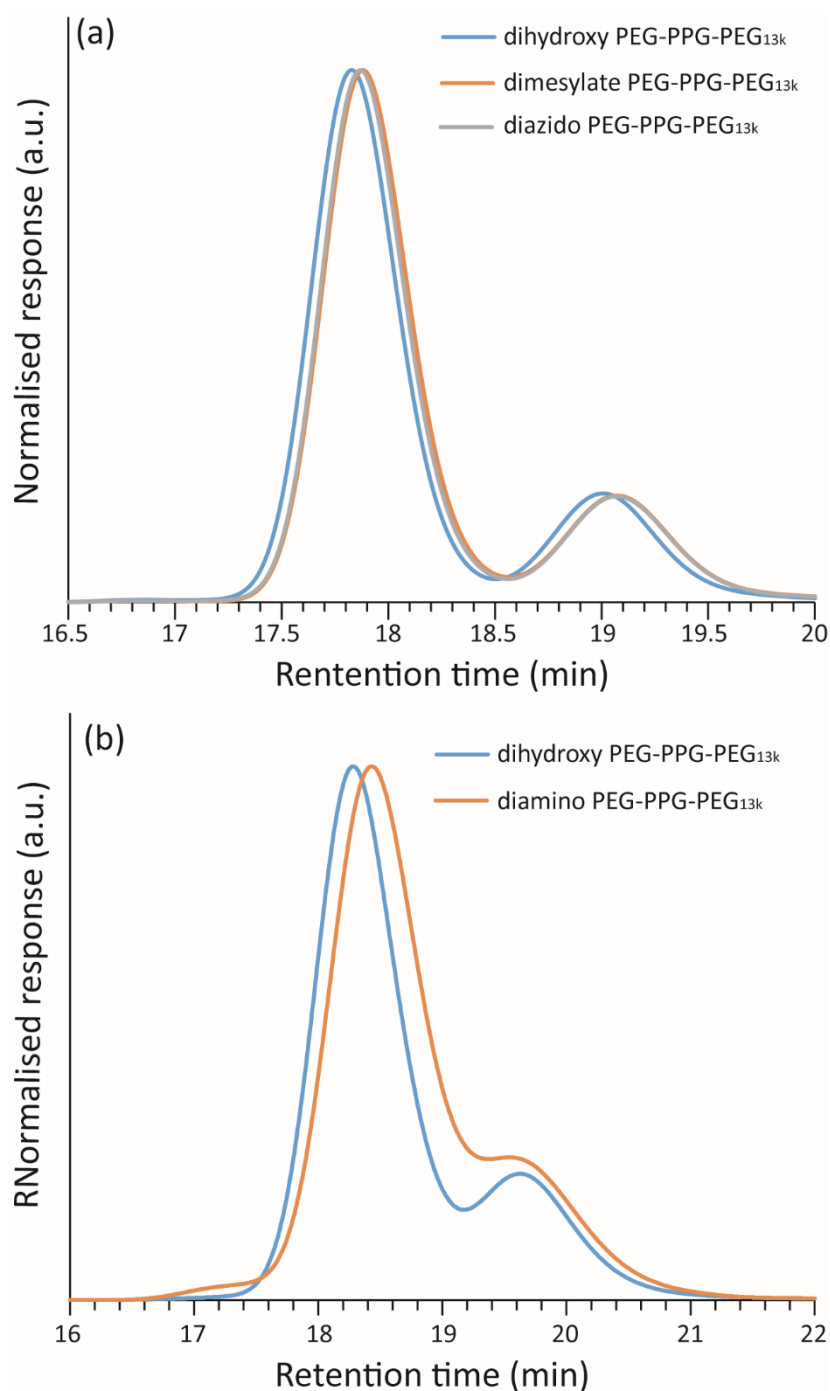

**Figure S21.** GPC chromatograms showing the conversion of the  $\alpha,\omega$ -dihydroxy PEG-PPG-PEG (Pluronic® F-127) to its  $\alpha,\omega$ -dimesylate,  $\alpha,\omega$ -diazido and  $\alpha,\omega$ -diamine PEG-PPG-PEG derivatives recorded using **(a)** THF or **(b)** 1:1 v/v MeOH:water (due to the poor solubility and aggregation of the  $\alpha,\omega$ -diamino PEG<sub>10k</sub> derivative in THF) as the mobile phase.

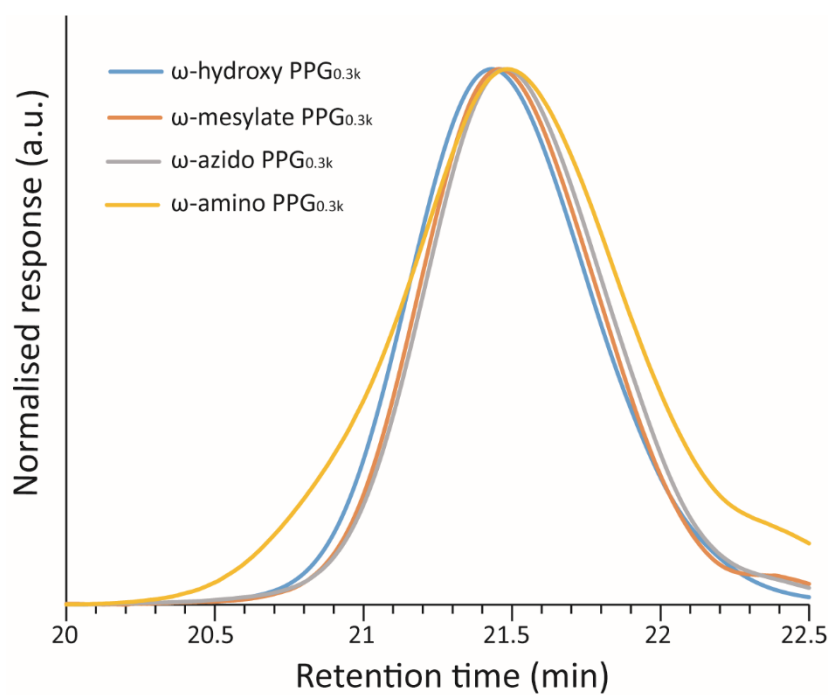

**Figure S22.** GPC chromatogram showing the conversion of the  $\alpha$ -butyl- $\omega$ -hydroxy PPG<sub>0.3k</sub> to its  $\alpha$ -butyl- $\omega$ -mesylate,  $\alpha$ -butyl- $\omega$ -azido and  $\alpha$ -butyl- $\omega$ -amino PEG<sub>0.3k</sub> derivatives recorded using THF as the mobile phase.

g. Figures for sequential reagent addition synthesis

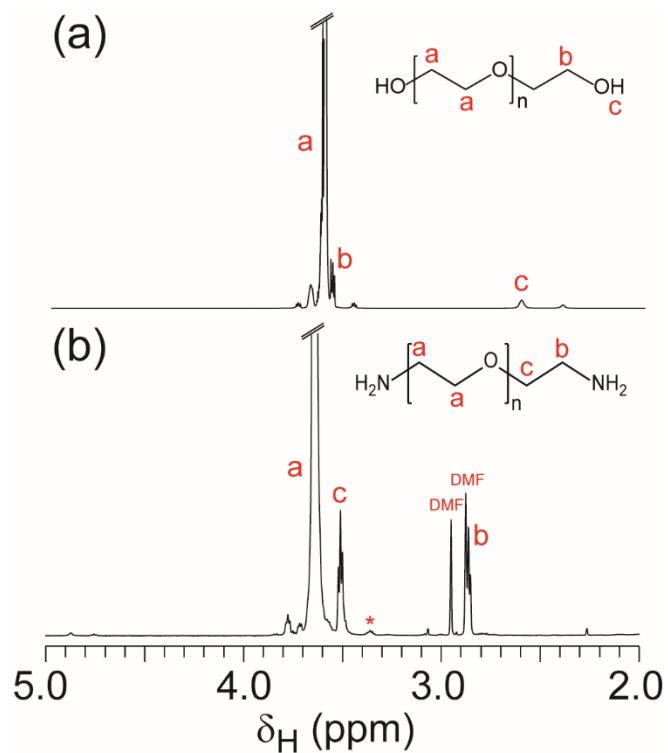

**Figure S23.**  $^1\text{H}$  NMR spectra (500 MHz, 23 °C,  $\text{CDCl}_3$ ) of (a)  $\alpha,\omega$ -dihydroxy  $\text{PEG}_{1.5\text{k}}$  and (b) the  $\alpha,\omega$ -diamine  $\text{PEG}_{1.5\text{k}}$  derivative prepared using sequential reagent addition without intermediate purification and isolation steps (\* indicates the remaining unreacted azido end-group).



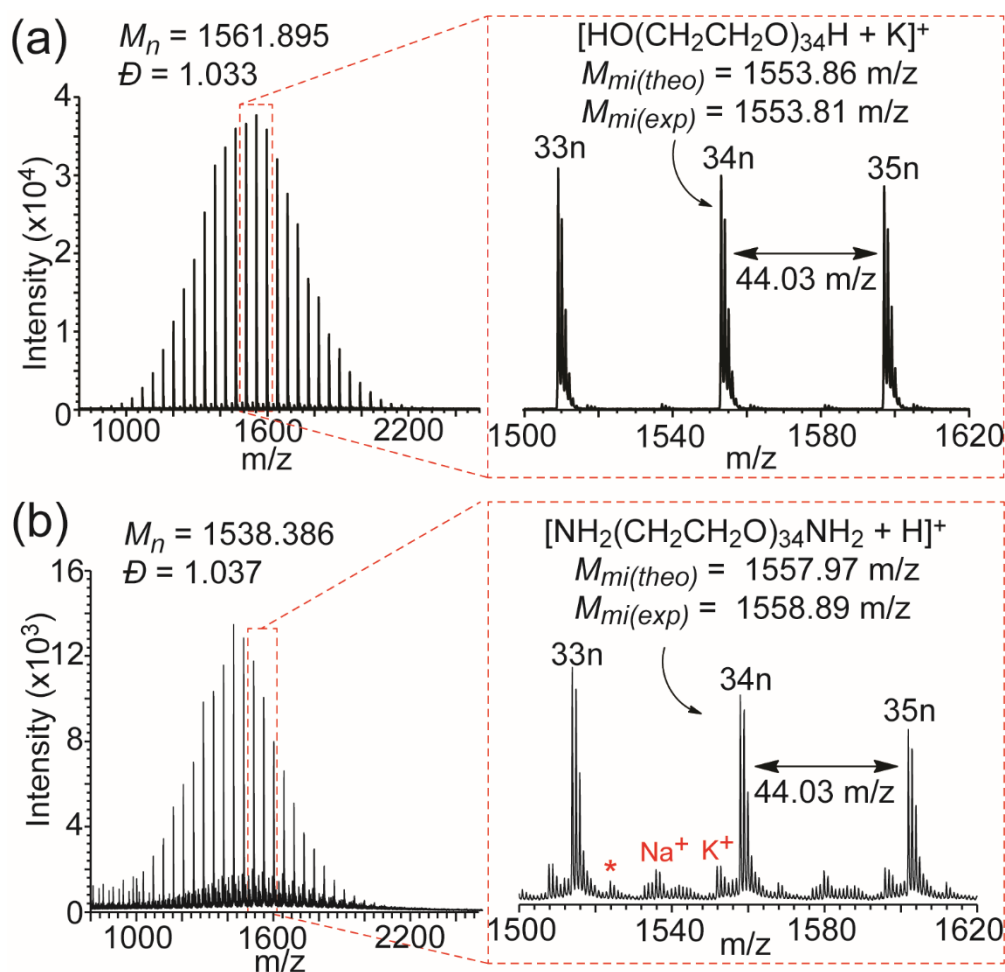

**Figure S24.** MALDI-ToF mass spectra of **(a)**  $\alpha,\omega$ -dihydroxy PEG<sub>1.5k</sub> and **(b)** the  $\alpha,\omega$ -diamine PEG<sub>1.5k</sub> derivative prepared using sequential reagent addition without intermediate purification and isolation steps (\* indicates the presence of the  $\text{N}_3\text{-PEG-NH}_2$  series as the proton adduct): expansions show 33-35 repeat unit region of the spectra with the theoretical ( $M_{mi(\text{theo})}$ ) and experimentally determined ( $M_{mi(\text{exp})}$ ) monoisotopic mass values for the potassium or proton adducts of polymers with  $n = 34$ .

### 3. Supporting Table

**Table S1.** Molecular weight characteristics of the polyglycols determined *via*  $^1\text{H}$  NMR spectroscopy, MALDI-ToF MS and GPC.

| Polymer                              | End-group | $^1\text{H}$ NMR <sup>a</sup> | $M_n$ (kDa)               |                  | $\bar{D}$                 |                  |
|--------------------------------------|-----------|-------------------------------|---------------------------|------------------|---------------------------|------------------|
|                                      |           |                               | MALDI-ToF MS <sup>b</sup> | GPC <sup>c</sup> | MALDI-ToF MS <sup>b</sup> | GPC <sup>c</sup> |
| <b>MeOPEG<sub>5.0k</sub></b>         | hydroxyl  | 5.2                           | 5.4                       | 5.4              | 1.01                      | 1.09             |
|                                      | mesylate  | 5.2                           | 5.4                       | 5.2              | 1.01                      | 1.03             |
|                                      | azido     | 5.2                           | 5.4                       | 5.2              | 1.01                      | 1.10             |
|                                      | amino     | 5.2                           | 5.7                       | 5.2              | 1.02                      | 1.11             |
| <b>PEG<sub>1.5k</sub></b>            | hydroxyl  | d                             | 1.6                       | 1.3              | 1.03                      | 1.05             |
|                                      | mesylate  | 1.4                           | 1.7                       | 1.5              | 1.03                      | 1.06             |
|                                      | azido     | 1.5                           | 1.6                       | 1.4              | 1.04                      | 1.09             |
|                                      | amino     | 1.4                           | 1.6                       | 1.3              | 1.03                      | 1.06             |
| <b>PEG<sub>4.0k</sub></b>            | hydroxyl  | d                             | 3.4                       | 3.3              | 1.02                      | 1.07             |
|                                      | mesylate  | 3.3                           | 3.6                       | 3.3              | 1.01                      | 1.06             |
|                                      | azido     | 3.2                           | 3.5                       | 3.4              | 1.01                      | 1.07             |
|                                      | amino     | 3.3                           | 3.3                       | 3.1              | 1.04                      | 1.07             |
| <b>PEG<sub>10k</sub></b>             | hydroxyl  | d                             | 10.2                      | 11.0 (10.9)      | 1.01                      | 1.08 (1.08)      |
|                                      | mesylate  | 9.9                           | 10.5                      | 10.4             | 1.01                      | 1.10             |
|                                      | azido     | 9.7                           | 10.4                      | 11.9             | 1.02                      | 1.07             |
|                                      | amino     | 9.7                           | 10.7                      | (10.6)           | 1.01                      | (1.12)           |
| <b>PEG<sub>35k</sub></b>             | hydroxyl  | d                             | e                         | 33.0 (31.5)      | e                         | 1.11 (1.14)      |
|                                      | mesylate  | 31.7                          | e                         | 34.5             | e                         | 1.11             |
|                                      | azido     | 31.1                          | e                         | 36.9             | e                         | 1.10             |
|                                      | amino     | 31.0                          | e                         | (31.1)           | e                         | (1.17)           |
| <b>4-Armed</b>                       | hydroxyl  | 10.6                          | 10.2                      | 9.5              | 1.01                      | 1.05             |
| <b>PEG<sub>10k</sub></b>             | mesylate  | 10.3                          | 10.3                      | 9.6              | 1.01                      | 1.05             |
|                                      | azido     | 10.2                          | 10.1                      | 9.5              | 1.01                      | 1.02             |
|                                      | amino     | 10.1                          | 10.1                      | 9.5              | 1.00                      | 1.11             |
| <b>Pluronic<sup>®</sup></b>          | hydroxyl  | d                             | e                         | 12.3 (11.9)      | e                         | 1.22 (1.24)      |
| <b>F-127</b>                         | mesylate  | 12.8                          | e                         | 11.5             | e                         | 1.24             |
|                                      | azido     | 12.7                          | e                         | 11.7             | e                         | 1.24             |
|                                      | amino     | 12.6                          | e                         | (11.6)           | e                         | (1.28)           |
| <b><i>n</i>BuOPPG<sub>0.3k</sub></b> | hydroxyl  | 0.5                           | 0.6                       | 0.6              | 1.08                      | 1.10             |
|                                      | mesylate  | 0.6                           | 0.6                       | 0.6              | 1.11                      | 1.08             |
|                                      | azido     | 0.6                           | 0.5                       | 0.5              | 1.12                      | 1.10             |

---

|       |     |     |     |      |      |
|-------|-----|-----|-----|------|------|
| amino | 0.5 | 0.5 | 0.5 | 1.03 | 1.17 |
|-------|-----|-----|-----|------|------|

---

<sup>a</sup> Number-average molecular weight determined from <sup>1</sup>H NMR spectroscopy by comparing the integration of the end-group proton resonances to the repeating unit proton resonances. <sup>b</sup> Number-average molecular weight determined from MALDI ToF MS for the major adduct series, using Polymerix software (Sierra Analytics). <sup>c</sup> Number-average molecular weight determined from GPC versus a conventional column calibration with PEG standards using THF as the mobile phase; values in brackets were determined using 1:1 v/v MeOH:water as the mobile phase. <sup>d</sup> Number-average molecular weight could not be determined from <sup>1</sup>H NMR as the characteristic resonances for the terminal methylene protons adjacent to the hydroxyl groups were not resolved to provide reference for calculation. <sup>e</sup> Number-average molecular weight could not be determined as average mass peaks for the polymer were not resolved.

---

## Reference

1. Zeng, R., Luo, Z., Zhou, D., Cao, F., Wang, Y., A novel PEG coating immobilized onto capillary through polydopamine coating for separation of proteins in CE. *Electrophoresis*, **2010**, 31, 3334-3341.
2. Zhou, C., Truong, V.X., Qu, Y., Lithgow, T., Fu, G., Forsythe, J.S., Antibacterial poly (ethylene glycol) hydrogels from combined epoxy - amine and thiol - ene click reaction. *J. Polym. Sci. Part A: Polym. Chem.*, **2016**, 54, 656-667.
